# Supplementary material
Source: Royal Society of Chemistry journal article supplement (doi:10.1039/d6cy00306k)
Supplement: d6cy00306k1.pdf [file d6cy00306k1.pdf]

## Supporting Information

### Tailored Synthesis of Hollow Tubular $\text{In}_2\text{O}_3/\text{In}_2\text{S}_3$ Z-Scheme Heterojunctions for Highly Selective CO Production in $\text{CO}_2$ Hydrogenation

Fenghao Xing,<sup>a</sup> Qiutong Han\*,<sup>a</sup> Lei Wang\*,<sup>a</sup> Buyun Shi,<sup>b</sup> Chuqiu Wang,<sup>a</sup> Yichang Pan,<sup>b</sup>

<sup>a</sup> School of Physical and Mathematical Sciences, Nanjing Tech University, Nanjing 211816, PR China

<sup>b</sup> State Key Laboratory of Materials-Oriented Chemical Engineering, College of Chemical Engineering, Nanjing Tech University, Nanjing 211816, PR China

\*Corresponding Authors E-mail:

hanqt@njtech.edu.cn.

wangl055@njtech.edu.cn

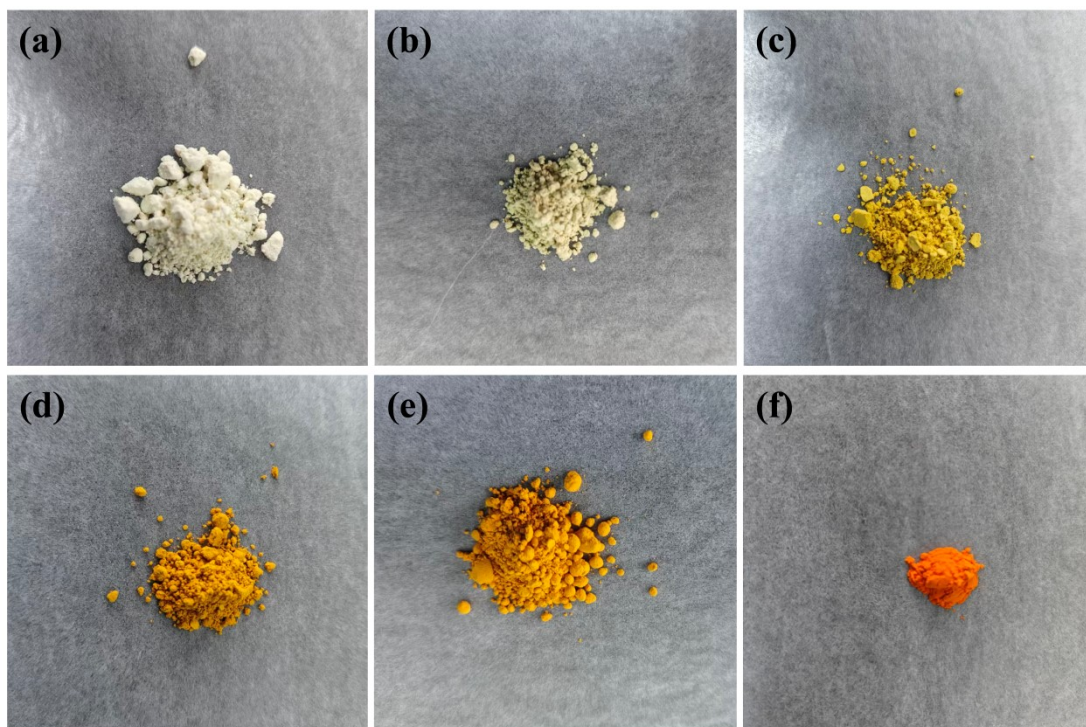

**Figure S1.** (a)  $\text{In}_2\text{O}_3$ , (b-e) IOIS-X (1, 2, 3, 4), (f)  $\text{In}_2\text{S}_3$ .

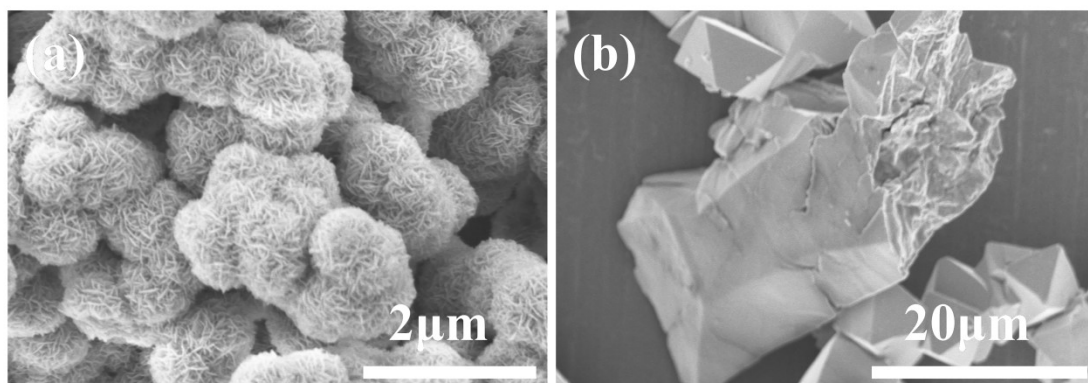

**Figure S2.** SEM images of (a)  $\text{In}_2\text{S}_3$ , (b)  $\text{In}_2\text{O}_3$  SSR.

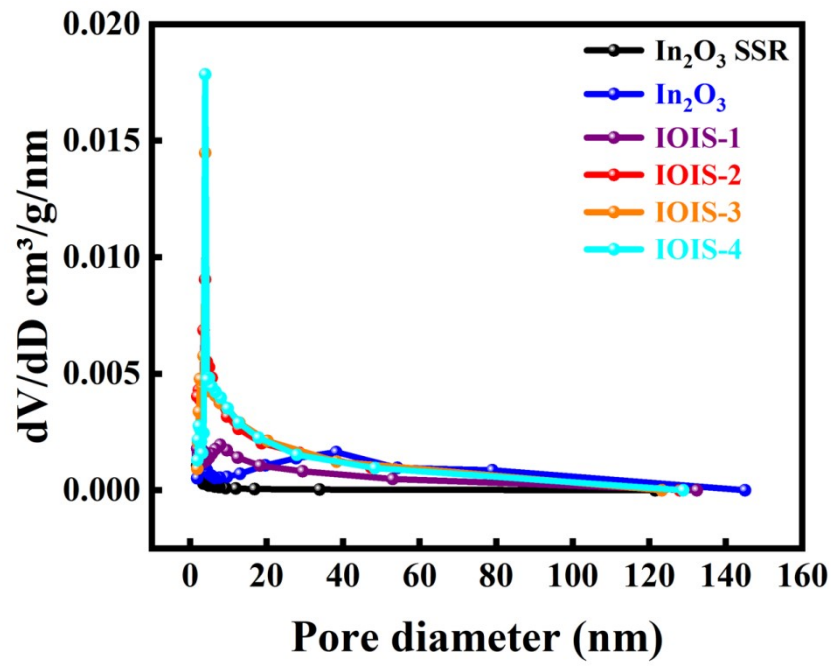

Figure S3. The pore size distribution of  $\text{In}_2\text{O}_3$  SSR,  $\text{In}_2\text{O}_3$ , and IOIS-X. (X=1,2,3,4)

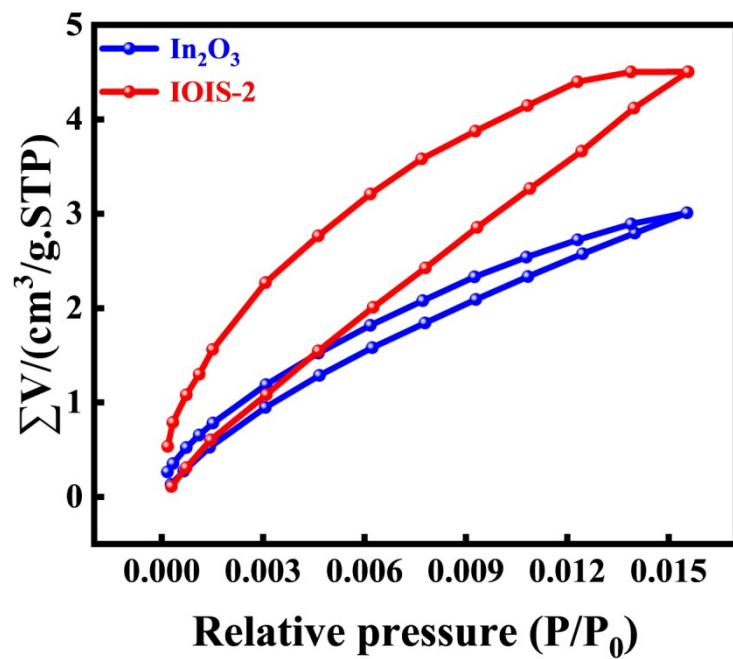

Figure S4. CO<sub>2</sub> adsorption isotherms of In<sub>2</sub>O<sub>3</sub> and IOIS-2.

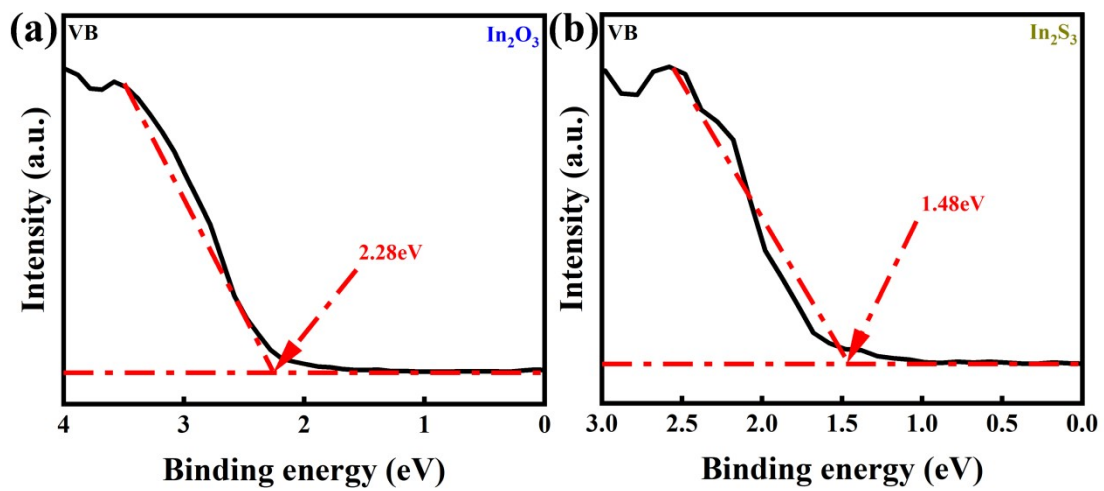

**Figure S5.** High resolution XPS valence band spectrum of (a)  $\text{In}_2\text{O}_3$  and (b)  $\text{In}_2\text{S}_3$ .

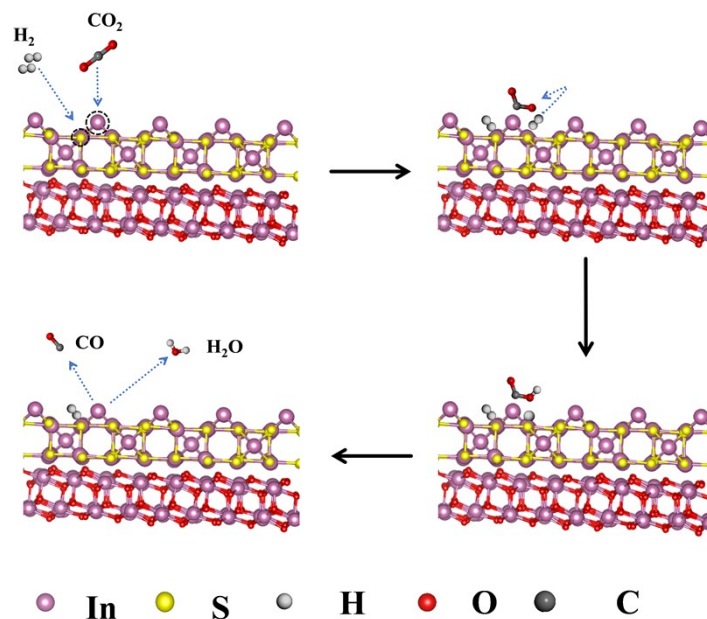

**Figure S6.** Catalytic mechanism diagram.

Based on previous studies and our preliminary characterization results, the adsorption and activation of  $\text{CO}_2$  occur primarily on the  $\text{In}_2\text{S}_3$  surface. It has been reported that the adsorption energies of  $\text{CO}_2$  on In sites and S sites are  $-1.25$  eV and  $-0.46$  eV, respectively.<sup>1,2</sup> Among these, the coordinatively unsaturated surface In sites exhibit a more negative adsorption energy (i.e., stronger  $\text{CO}_2$  adsorption capability), indicating that these sites serve as the active centers for  $\text{CO}_2$  activation. Meanwhile, the adjacent surface S atoms are primarily responsible for the adsorption and dissociation of  $\text{H}_2$ , thereby promoting the subsequent hydrogenation of  $^*\text{CO}_2$  intermediates.

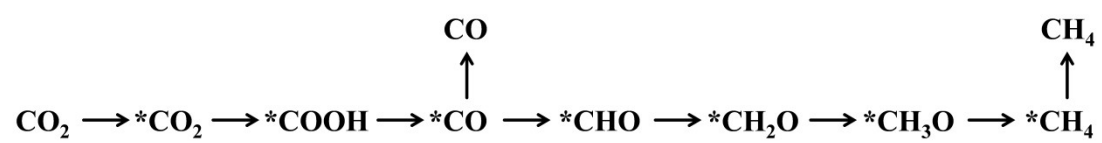

**Figure S7.** Reaction pathways for CO and CH<sub>4</sub> production on IOIS-2.

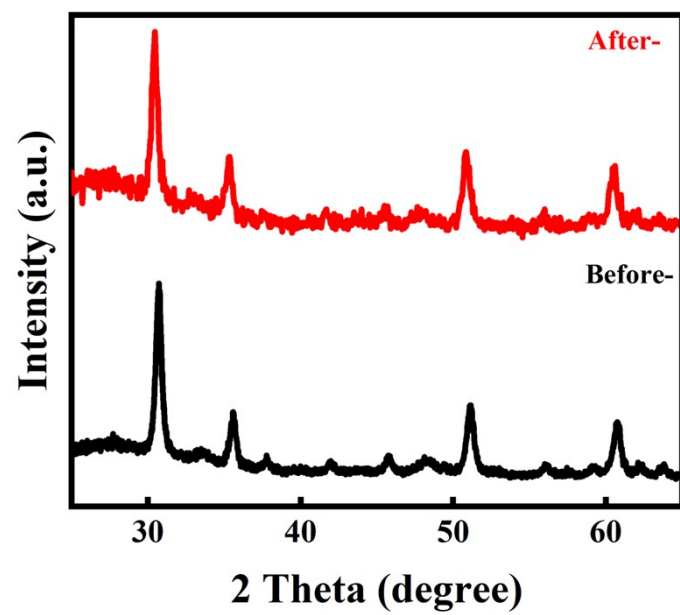

**Figure S8.** XRD patterns of IOIS-2 before and after the CO<sub>2</sub> reduction reaction.

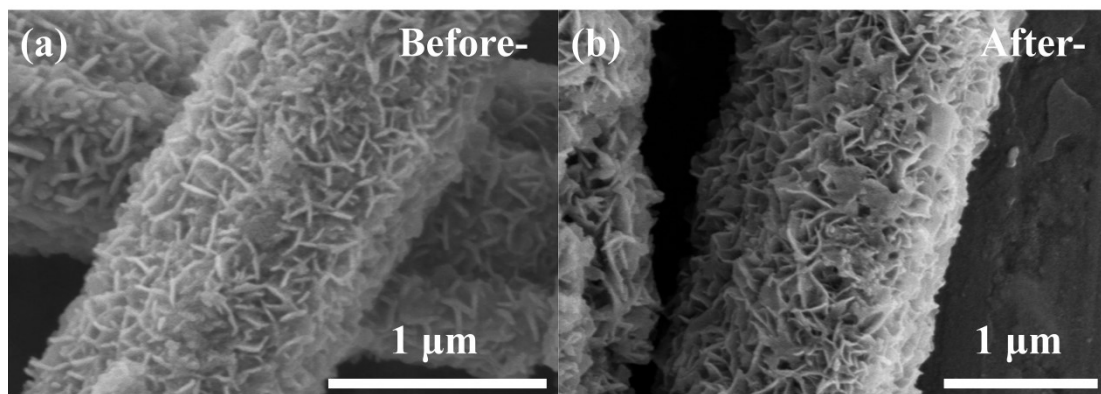

**Figure S9.** SEM images of IOIS-2 the photothermal catalyst (a) before and (b) after the CO<sub>2</sub> reduction reaction.

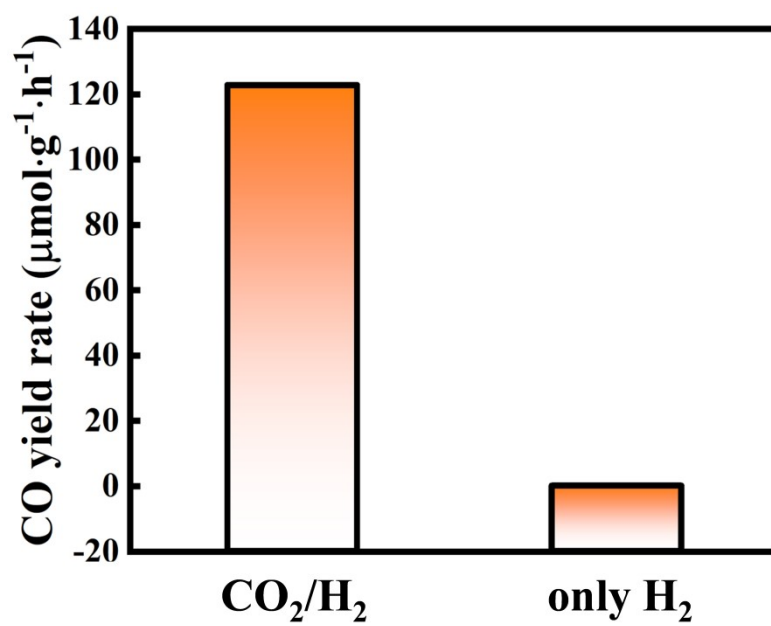

**Figure S10.** Comparison of CO production rates under CO<sub>2</sub>-H<sub>2</sub> mixture and pure H<sub>2</sub>.

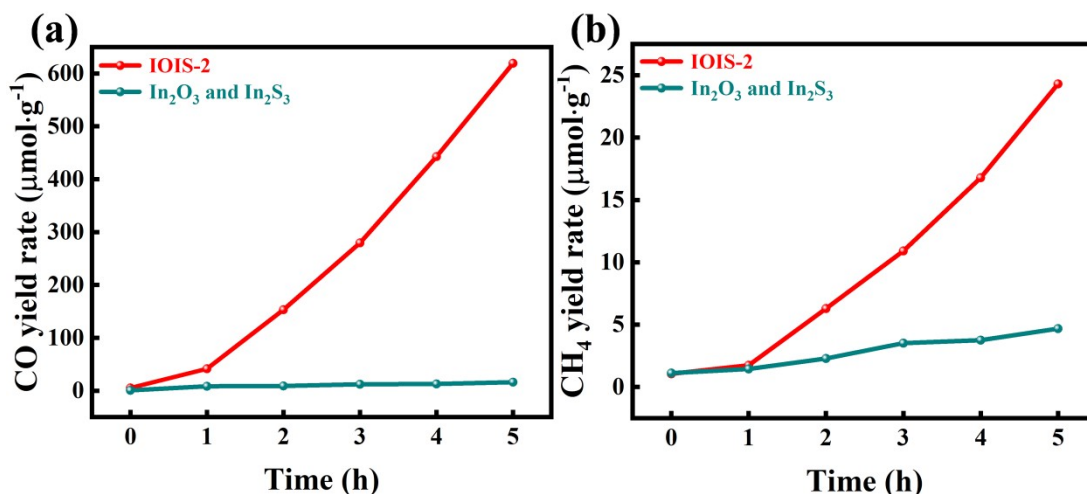

**Figure S11.** Comparison of CO generation rates between physical grinding and IOIS-2.

To validate the superiority of the Z-scheme heterojunction over a simple combination of the two materials, we prepared a physically mixed sample of In<sub>2</sub>O<sub>3</sub> and In<sub>2</sub>S<sub>3</sub> at the same mass ratio as IOIS-2 heterojunction. Under identical CO<sub>2</sub> reduction conditions, the physical mixture yielded CO and CH<sub>4</sub> production rates that are significantly lower than those of the Z-scheme heterojunction (Fig. S11). This result rules out any mechanical mixing effect and demonstrates that the intimate interfacial contact and directional Z-scheme charge transfer in the heterojunction are essential for promoting charge separation and utilizing the strong reduction potential required for efficient CO<sub>2</sub> reduction.

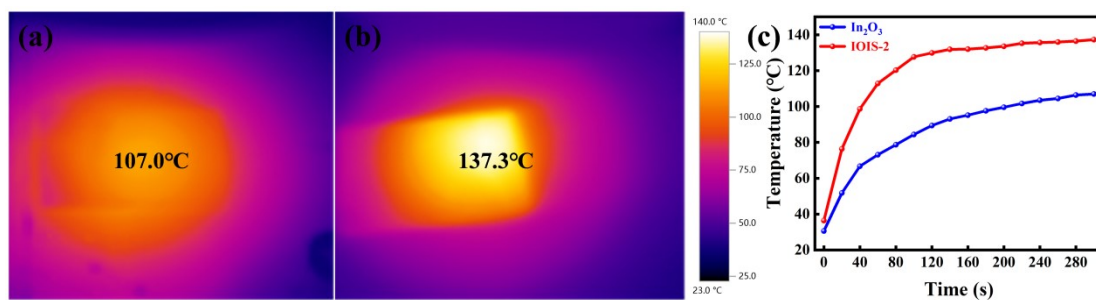

**Figure S12.** Surface temperatures of (a)  $\text{In}_2\text{O}_3$  and (b) IOIS-2 under xenon lamp irradiation; (c) temperature variation at the initial irradiation stage.

The surface temperature of the catalysts was monitored by a Testo 865 thermal imager. After 5 min of illumination, the surface temperature of IOIS-2 reached  $137.3^\circ\text{C}$ , notably higher than that of  $\text{In}_2\text{O}_3$  ( $107.0^\circ\text{C}$ ), confirming that the superior photothermal effect of IOIS-2 facilitates the photothermal  $\text{CO}_2$  reduction reaction.

**Table S1.** A comparative study of catalysts for the hydrogenation of CO<sub>2</sub> to CO.

| Catalyst                                                      | Rate/ $\mu\text{mol}\cdot\text{g}^{-1}\cdot\text{h}^{-1}$ | Selectivity/% | Temperature/ $^{\circ}\text{C}$ | Pressure/MPa | CO <sub>2</sub> /H <sub>2</sub> | Refs      |
|---------------------------------------------------------------|-----------------------------------------------------------|---------------|---------------------------------|--------------|---------------------------------|-----------|
| In <sub>2</sub> O <sub>3-x</sub> (OH) <sub>y</sub> /SiNW      | 22                                                        | 100           | -                               | 0.2          | 1                               | 3         |
| Fe@C/Ni <sub>2</sub> P                                        | 179.90                                                    | 96.86         | 200                             | -            | -                               | 4         |
| In <sub>2</sub> O <sub>3-x</sub> (OH) <sub>y</sub> on Ni foam | 755                                                       | 100           | 295                             | 0.1          | 1                               | 5         |
| V <sub>4</sub> C <sub>3</sub> -MXene                          | 95.68                                                     | 96            | 250                             | 0.12         | 1/3                             | 6         |
| CoO <sub>x</sub> /WO <sub>3-x</sub>                           | 26.07                                                     | 79.88         | 25                              | 0.1          | -                               | 7         |
| 3Cu-6Ni-Bi <sub>2</sub> MoO <sub>6</sub>                      | 73.29                                                     | 74.86         | 200                             | -            | -                               | 8         |
| Fe@(N)C                                                       | 13.29                                                     | ~100          | 245                             | 0.1          | 1                               | 9         |
| IOIS-2                                                        | 122.80                                                    | 96.35         | 180                             | 0.1          | 3                               | This Work |

## References

- 1 Zhou, B.; Li, Z.; Xu, J.; Zheng, Y.; Zhang, Y.; Yuan, Y.; Yan, Y.; Kou, J.; Zhou, X.; Du, J.; Wu, X.; Shen, Q.; Zou, Z.; Zhou, Y. *ACS Appl. Nano Mater.* 2025, **8**, 12314-12321.
- 2 Wang, K.; Hu, Y.; Liu, X.; Li, J.; Liu, B. *Nat. Commun.* 2025, **16**, 2094.
- 3 Hoch, L. B.; O'Brien, P. G.; Ali, F. M.; Sandhel, A.; Perovic, D. D.; Mims, C. A.; Ozin, G. A. *ACS Nano.* 2016, **10**, 9017-9025.
- 4 Zhu, P.; Geng, M.; Qin, S.; Cao, H.; He, Z.; Gao, X.; Wang, C. *Surf. Interfaces.* 2024, **46**, 104032.
- 5 Hurtado, L.; Mohan, A.; Ulmer, U.; Natividad, R.; Tountas, A. A.; Sun, W.; Wang, L.; Kim, B.; Sain, M. M.; Ozin, G. A. *Chem. Eng. J.* 2022, **435**, 134864.
- 6 Liu, Y.; Tan, G.; Feng, S.; Zhang, B.; Liu, T.; Wang, Z.; Bi, Y.; Yang, Q.; Ren, H.; Lv, L.; Liu, W.; Xia, A.; Zhao, Q. *Sep. Purif. Technol.* 2023, **326**, 124726.
- 7 Yang, J.; Tian, R.; Wang, D.; Dai, J.; Du, Z. *Acta Mater. Compos. Sin.* 2023, **40**, 5158-5169.
- 8 Guo, M.; Chen, Y.; Liu, J.; Qiu, J.; Wang, W.; Yang, Z. *Appl. Surf. Sci.* 2026, **730**, 166190.
- 9 Szalad, H.; Lu, P.; Primo, A.; Alberio, J.; Garcia, H. *Chem. Commun.*, 2021, **57**, 10075.
